# Supplementary material for: Association among Premenstrual Syndrome, Dietary Patterns, and Adherence to Mediterranean Diet
Source: MDPI journal article supplement (doi:10.3390/nu14122460), 2022-06-14
Supplement: s1 [file s1]

## Supporting information

Supplementary Table S1. Factor loadings of the dietary patterns derived from factor analysis

| Variables              | Traditional diet pattern | Meat and alcohol pattern | Bread and snack pattern |
|------------------------|--------------------------|--------------------------|-------------------------|
| Rice                   | -0.018                   | <b>0.649</b>             | -0.020                  |
| Noodles/dumplings      | 0.000                    | <b>0.528</b>             | 0.401                   |
| Breads/rice cakes      | 0.100                    | 0.139                    | <b>0.830</b>            |
| Soup/stew              | 0.571                    | <b>0.665</b>             | 0.117                   |
| Eggs                   | 0.452                    | 0.031                    | 0.416                   |
| Red meat               | 0.408                    | <b>0.666</b>             | 0.196                   |
| White meat             | 0.066                    | 0.332                    | 0.361                   |
| Fish/seafood           | <b>0.623</b>             | 0.389                    | 0.134                   |
| Vegetables             | <b>0.656</b>             | 0.263                    | 0.250                   |
| Kimchi                 | <b>0.578</b>             | 0.190                    | -0.098                  |
| Seaweed                | <b>0.694</b>             | -0.120                   | 0.041                   |
| Potatoes               | <b>0.732</b>             | 0.096                    | 0.041                   |
| Fruits                 | <b>0.600</b>             | -0.305                   | 0.361                   |
| Snacks                 | 0.102                    | 0.161                    | <b>0.721</b>            |
| Alcoholic beverages    | 0.017                    | 0.280                    | 0.181                   |
| Variance explained (%) | 21.7                     | 14.6                     | 13.2                    |
